# Supplementary material
Source: Springer Nature journal article supplement (https://www.springermedizin.de/resource/supplementary/12960_2004_15_MOESM4_ESM.pdf/9570258)

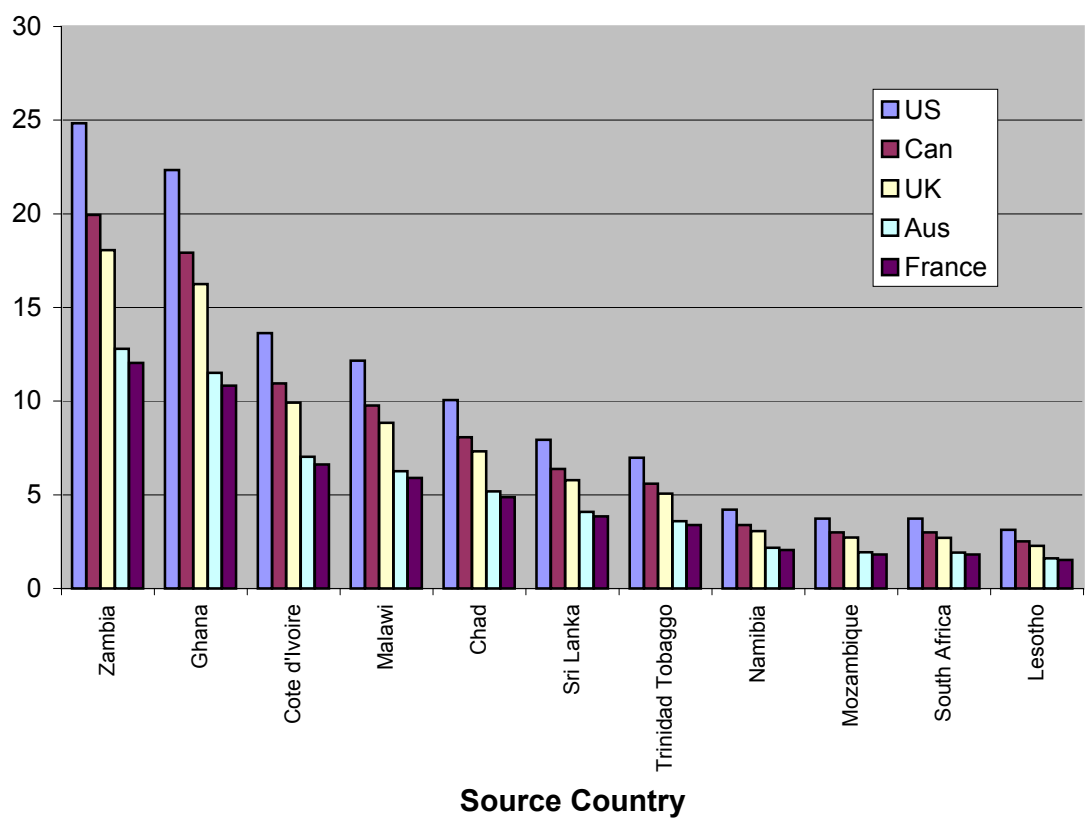

Supplement: MOESM4 [file 9570258]
